# Supplementary material for: Human Hepatic CD56bright NK Cells Display a Tissue-Resident Transcriptional Profile and Enhanced Ability to Kill Allogenic CD8+ T Cells
Source: PubMed Central journal article supplement (PMC9295839; doi:10.3389/fimmu.2022.921212), 2022-07-05
Supplement: DataSheet_1.pdf [file DataSheet_1.pdf]

## *Supplementary Material*

### 1 Supplementary Data

Supplementary Data is located in the ‘Supplementary\_Data.xlsx’ file.

### 2 Supplementary Tables

Supplementary Table 1: Kits and reagents

|                      | <b>Item</b>                            | <b>Code</b> | <b>Brand</b>       | <b>Supplier</b>          |
|----------------------|----------------------------------------|-------------|--------------------|--------------------------|
| <b>Media/Buffers</b> | RPMI 1640 Medium, GlutaMAX™ Supplement | 61870-010   | Gibco™             | Thermo Fisher Scientific |
|                      | Penicillin-Streptomycin (10,000 U/mL)  | 15140122    | Gibco™             | Thermo Fisher Scientific |
|                      | Fetal Bovine Serum                     | F9665       | Sigma-Aldrich      | Merck                    |
|                      | Ficoll-Paque™ PLUS Media               | 11778538    | Cytiva             | GE Healthcare            |
|                      | Hank's 1X Balanced Salt Solution       | 11546291    | HyClone™           | GE Healthcare            |
|                      | Bovine Serum Albumin (BSA)             | 12330023    | HyClone™           | GE Healthcare            |
|                      | Molecular grade water                  | 10787944    | HyClone™           | GE Healthcare            |
|                      | FcR Blocking reagent                   | 130-059-901 | Miltenyi Biotech   | Miltenyi Biotech         |
|                      | BD Horizon Brilliant Stain Buffer      | 563-794     | BD Biosciences     | BD Biosciences           |
| <b>Chemicals</b>     | Dimethyl Sulfoxide                     | 10103483    | Fisher Bioreagents | Thermo Fisher Scientific |
|                      | EDTA                                   | 15575020    | Invitrogen         | Thermo Fisher Scientific |
|                      | DNase I                                | 9003-98-9   | Sigma Aldrich      | Merck                    |
|                      | Tumor digestion kit                    | 130-095-929 | Miltenyi Biotech   | Miltenyi Biotech         |
|                      | Potassium hydrogen carbonate,          | 15149724    | ACROS Organics     | Thermo Fisher Scientific |
|                      | Ammonium chloride,                     | 10296920    | ACROS Organics™    | Thermo Fisher Scientific |
| <b>Kits</b>          | EasySep™ Human NK Cell Isolation Kit   | 17955       | STEMCELL           | STEMCELL                 |
|                      | RosetteSep™ Human NK Cell Isolation    | 15025       | STEMCELL           | STEMCELL                 |

Supplementary Material

|                              |                                                      |              |                   |                   |
|------------------------------|------------------------------------------------------|--------------|-------------------|-------------------|
|                              | EasySep™ Human CD3 <sup>+</sup> T Cell Isolation Kit | 17851        | STEMCELL          | STEMCELL          |
| <b>Functional Antibodies</b> | αCD3                                                 | 40-0037-U500 | Tonbo Biosciences | Tonbo Biosciences |
|                              | αCD28                                                | 40-0289-U500 | Tonbo Biosciences | Tonbo Biosciences |
|                              | αCD160 clone CL1-R2                                  | K0122-1      | MBL               | Caltag            |
|                              | Purified Mouse IgG1, κ Isotype Ctrl Antibody         | 400102       | Biolegend         | MSC               |
| <b>Cytokines</b>             | IL-15                                                | 130-095-762  | Miltenyi          | Miltenyi          |

Supplementary Table 2: Flow cytometry antibodies and viability stains

| Target     | Indicated Panel                       | Clone     | Fluorophore      | Code             | Supplier                 |
|------------|---------------------------------------|-----------|------------------|------------------|--------------------------|
| CD127      | RNA-Seq sort                          | REA614    | APC-Vio770       | 130-109-438      | Miltenyi Biotech         |
| CD3        | RNA-Seq sort                          | UCHT1     | BV421            | BD 562426        | BD                       |
| CD45       | RNA-Seq sort                          | HI30      | BV510            |                  | BD                       |
| CD56       | RNA-Seq sort                          | NCAM16.2  | BV711            | BD 563169        | BD                       |
| CD16       | RNA-Seq sort                          | 3G8       | PE-Cy7           | BD 557744        | BD                       |
| Dead cells | RNA-Seq sort                          | -         | Propidium iodide | P1304MP          | Thermo Fisher Scientific |
| Dead cells | NK and T cell cocultures              | -         | Zombie Yellow    | 423104           | BioLegend                |
| Dead cells | Phenotyping                           | -         | Zombie NearIR    | 423106           | BioLegend                |
| CD56       | NK and T cell cocultures /Phenotyping | AF12-7H3  | VioBright FITC   | 130-113-871      | Miltenyi                 |
| CD16       | NK and T cell cocultures /Phenotyping | 3G8       | Pe-Cy7           | 302016           | BioLegend                |
| CD19       | NK and T cell cocultures              | HIB19     | PerCpCy5.5       | TO0265-0199-T100 | Tonbo                    |
| CD8        | NK and T cell cocultures              | SK1       | APC-Cy7          | 557834           | BD                       |
| CD4        | NK and T cell cocultures              | RPA-T4    | PE               | 60-0049-T100     | Tonbo BioSciences        |
| CXCR6      | Phenotyping                           | K041E5    | PerCpCy5.5       | 356010           | BioLegend                |
| CD160      | Phenotyping                           | BY55      | AF647            | 341204           | BioLegend                |
| CD3        | Phenotyping                           | HIT3a     | PacBlue          | 300330           | BioLegend                |
| CD69       | Phenotyping                           | FN50      | BV510            | 310936           | BioLegend                |
| LY9        | Phenotyping                           | HLy9.1.25 | BV605            | 745243           | BD                       |
| NKG2D      | Phenotyping                           | 1D11      | BV711            | 563688           | BD                       |
| TIGIT      | Phenotyping                           | A15153G   | PE               | 372704           | BioLegend                |
| CD49a      | Phenotyping                           | REA1106   | PE-Vio615        | 130 119 308      | Miltenyi                 |
| CD8        | Phenotyping                           | RPA-T8    | BUV395           | 563795           | BD                       |
| CD127      | Phenotyping                           | A019D5    | BV570            | 351307           | BioLegend                |

Supplementary Table 3: Tissue residency gene sets

| Publication                                                     | Details                                                       | Genes                                                                                                                                                                                                                                                                                                                                                                                                                                                                                                                                                                                                                                                    |
|-----------------------------------------------------------------|---------------------------------------------------------------|----------------------------------------------------------------------------------------------------------------------------------------------------------------------------------------------------------------------------------------------------------------------------------------------------------------------------------------------------------------------------------------------------------------------------------------------------------------------------------------------------------------------------------------------------------------------------------------------------------------------------------------------------------|
| Kumar <i>et al.</i> 2017<br>(doi: 10.1016/j.celrep.2017.08.078) | Up regulated in human tissue-resident CD8+CD69+ populations   | ARHGAP18, CCR1, CRTAM, TMIGD2, IL17RE, KCNK5, IL23R, TRPM2, ADAM12, IRF4, RGS1, KCNQ3, COL5A1, FSD1, CSF1, DAB2IP, IL10, MCAM, CPNE7, ATP8B4, CXCR6, ITGAE, SPRY1, SCUBE1, ITGA1, GSG2, IL17A, CXCL13, CA10                                                                                                                                                                                                                                                                                                                                                                                                                                              |
| Kumar <i>et al.</i> 2017<br>(doi: 10.1016/j.celrep.2017.08.078) | Down regulated in human tissue-resident CD8+CD69+ populations | LRFN2, DGKK, FGFBP2, SLC1A7, TXNDC3, CX3CR1, KIR3DX1, KRT73, KIF19, PRSS23, SH3RF2, RAP1GAP2, SGCD, EPHX4, KRT72, ASCL2, PTGDS, PODN, CXCR2, EFHC2, LAIR2, SOX13, C1orf21, PALLD, NUA1, COL6A2, TKTL1, PCDH1, ZNF711, SELL, S1PR1, DNAI2, FLJ13197, FAM19A1, LILRB1, GPR56, SELP, DCHS1, OSBP5, FCGR3A, MSX2P1, SLCO4C1, PLEKHG3, D4S234E, PDZD4, SPTB, EBF4, PATL2, LOXL4, ITGAM, NPDC1, TTYH2, ME3, TTC16, SBK1, GPA33, VCL, ZNF365, KLF3, SSBP3, FZD4, KLF2, FAM65B, KIR2DS4, TFCP2L1, MTSS1, TMCC3, CFH, AGPAT4, SVIL, HPCAL4, TSPAN18, STK38, SSX2IP, NHSL2, ADAMTS10, GNLY, PELI2                                                                  |
| Mackay <i>et al.</i> 2016<br>(doi: 10.1126/science.aad2035)     | Up regulated in murine tissue-resident memory T cells         | ABI3, ARRDC3, ATF3, B4GALNT4, BTG2, CD244, CD69, CDH1, CISH, CSRN1, CTNNA1, CXCR6, DDX3X, DGAT1, DHCR24, DUSP1, DUSP5, DUSP6, EGR1, EHD1, EYA2, FOS, FOSB, FOXL2, FRMD4B, GADD45B, GLRX, GPR171, GPR34, GPR55, HILPDA, HMGCS1, HPGDS, HSPA5, HSPD1, IFNG, INPP4B, INSIG1, IRF4, ISG20, ITGAE, JUN, JUNB, KLF6, LAD1, LDLRAD4, LITAF, LY6G5B, MAPKAPK3, NEDD4, NEURL3, NFKBID, NR4A1, NR4A2, ODC1, OSGIN1, P2RY10, P4HB, PER1, PLK3, PNRC1, PPP1R15A, PPP1R16B, PYGL, QPCT, RGS2, RHOB, RNF149, SIK1, SKIL, SMIM3, SPSB1, STARD4, TNFAIP3, TRAF4, VDAC1, XCL1, ZFP36, AMICA1, GPR56, GSG2, SC4MOL                                                         |
| Mackay <i>et al.</i> 2016<br>(doi: 10.1126/science.aad2035)     | Down regulated in murine tissue-resident memory T cells       | AAED1, ABHD8, ABTB2, ACP5, ARHGAP26, ARHGEF18, ASRGL1, ATP10D, ATP1B3, AVEN, B3GAT3, BCL9L, CCL5, CD84, CDC25B, CXCR4, DOCK2, EHD3, ELMO1, EMB, KBTBD11, EML3, EOMES, FAM117A, FAM49A, FAM89B, FGF13, GAB3, GLIPR2, GMFG, GNPDA2, GRAMD4, HAAO, HEXB, ICAM2, IL10RA, ITGA4, ITGB1, ITGB2, KCNAB2, KCNN4, KLF2, KLF3, KLHL6, LEF1, LFNG, LPIN1, LYRM2, LYST, MPND, NCLN, PAQR7, PCED1B, PDE2A, PIK3R5, PODNL1, POGK, PRKCQ, PYHIN1, RACGAP1, RASA3, RASGRP2, RBM43, S1PR1, S1PR4, S1PR5, SAMHD1, SBK1, SETX, SH2D1A, SIDT1, SMPDL3B, SNX10, ST3GAL1, STK38, TBXA2R, TCF7, THAP7, TMEM71, TSR3, TTC7B, TXK, TXNDC5, VOPPI, XRN2, ACPL2, CD97, CMAH, FAM65B |

Supplementary Table 4: Functional enrichment analysis of liver-resident CD56<sup>bright</sup> NK cells versus peripheral blood CD56<sup>bright</sup> NK cells

| Source | Term Name                                    | Term ID            | Adjusted <i>P</i> -value |
|--------|----------------------------------------------|--------------------|--------------------------|
| GO:BP  | immune system process                        | GO:0002376         | 7.00E-23                 |
| GO:BP  | leukocyte activation                         | GO:0045321         | 2.59E-16                 |
| GO:BP  | immune response                              | GO:0006955         | 5.00E-16                 |
| GO:BP  | cell activation                              | GO:0001775         | 1.46E-15                 |
| REAC   | Cytokine Signaling in Immune system          | REAC:R-HSA-1280215 | 7.40E-15                 |
| GO:BP  | regulation of immune system process          | GO:0002682         | 8.89E-15                 |
| GO:BP  | immune effector process                      | GO:0002252         | 3.40E-14                 |
| GO:BP  | T cell activation                            | GO:0042110         | 3.11E-13                 |
| GO:BP  | regulation of leukocyte activation           | GO:0002694         | 6.05E-12                 |
| GO:BP  | lymphocyte activation                        | GO:0046649         | 1.08E-11                 |
| REAC   | Interferon alpha/beta signaling              | REAC:R-HSA-909733  | 1.32E-11                 |
| REAC   | Immune System                                | REAC:R-HSA-168256  | 3.42E-11                 |
| GO:BP  | type I interferon signaling pathway          | GO:0060337         | 3.73E-11                 |
| GO:BP  | cellular response to type I interferon       | GO:0071357         | 3.73E-11                 |
| GO:BP  | leukocyte differentiation                    | GO:0002521         | 4.59E-11                 |
| GO:BP  | response to cytokine                         | GO:0034097         | 4.88E-11                 |
| GO:BP  | regulation of cell activation                | GO:0050865         | 5.21E-11                 |
| GO:BP  | cytokine-mediated signaling pathway          | GO:0019221         | 9.99E-11                 |
| GO:BP  | response to type I interferon                | GO:0034340         | 1.01E-10                 |
| GO:BP  | alpha-beta T cell activation                 | GO:0046631         | 1.08E-10                 |
| GO:BP  | regulation of T cell activation              | GO:0050863         | 1.83E-10                 |
| GO:BP  | response to biotic stimulus                  | GO:0009607         | 2.88E-10                 |
| GO:BP  | response to other organism                   | GO:0051707         | 3.86E-10                 |
| GO:BP  | response to external biotic stimulus         | GO:0043207         | 4.20E-10                 |
| GO:BP  | immune system development                    | GO:0002520         | 1.58E-09                 |
| GO:BP  | hematopoietic or lymphoid organ development  | GO:0048534         | 1.77E-09                 |
| GO:BP  | cellular response to cytokine stimulus       | GO:0071345         | 2.33E-09                 |
| GO:BP  | positive regulation of immune system process | GO:0002684         | 3.52E-09                 |
| REAC   | Interferon Signaling                         | REAC:R-HSA-913531  | 3.88E-09                 |
| GO:BP  | hemopoiesis                                  | GO:0030097         | 4.11E-09                 |
| GO:BP  | leukocyte cell-cell adhesion                 | GO:0007159         | 4.32E-09                 |
| GO:BP  | lymphocyte differentiation                   | GO:0030098         | 6.25E-09                 |
| GO:BP  | regulation of leukocyte cell-cell adhesion   | GO:1903037         | 9.19E-09                 |
| GO:BP  | regulation of lymphocyte activation          | GO:0051249         | 1.05E-08                 |
| GO:BP  | response to external stimulus                | GO:0009605         | 1.09E-08                 |
| GO:BP  | response to virus                            | GO:0009615         | 1.52E-08                 |
| GO:BP  | interspecies interaction between organisms   | GO:0044419         | 3.08E-08                 |

## Supplementary Material

|       |                                                         |            |             |
|-------|---------------------------------------------------------|------------|-------------|
| GO:BP | regulation of response to stimulus                      | GO:0048583 | 6.82E-08    |
| GO:BP | biological adhesion                                     | GO:0022610 | 7.26E-08    |
| GO:BP | T cell differentiation                                  | GO:0030217 | 9.81E-08    |
| GO:BP | cell adhesion                                           | GO:0007155 | 1.24E-07    |
| GO:BP | regulation of cell adhesion                             | GO:0030155 | 1.62E-07    |
| GO:BP | defense response to virus                               | GO:0051607 | 1.66E-07    |
| GO:BP | defense response                                        | GO:0006952 | 1.71E-07    |
| GO:BP | regulation of leukocyte differentiation                 | GO:1902105 | 1.75E-07    |
| GO:BP | positive regulation of leukocyte cell-cell adhesion     | GO:1903039 | 2.22E-07    |
| GO:BP | response to stress                                      | GO:0006950 | 3.13E-07    |
| GO:BP | regulation of multicellular organismal process          | GO:0051239 | 4.22E-07    |
| GO:BP | regulation of cell-cell adhesion                        | GO:0022407 | 4.26E-07    |
| GO:BP | positive regulation of multicellular organismal process | GO:0051240 | 4.32E-07    |
| GO:BP | cell surface receptor signaling pathway                 | GO:0007166 | 4.37E-07    |
| GO:BP | positive regulation of T cell activation                | GO:0050870 | 4.40E-07    |
| GO:BP | positive regulation of cell activation                  | GO:0050867 | 4.65E-07    |
| GO:BP | positive regulation of leukocyte activation             | GO:0002696 | 5.04E-07    |
| GO:BP | myeloid leukocyte activation                            | GO:0002274 | 5.07E-07    |
| GO:BP | CD4-positive, alpha-beta T cell activation              | GO:0035710 | 5.66E-07    |
| GO:BP | positive regulation of cell adhesion                    | GO:0045785 | 6.75E-07    |
| GO:BP | response to organic substance                           | GO:0010033 | 1.13201E-06 |
| GO:BP | cellular response to organic substance                  | GO:0071310 | 1.39472E-06 |
| GO:BP | response to interferon-alpha                            | GO:0035455 | 1.55613E-06 |
| GO:BP | positive regulation of hemopoiesis                      | GO:1903708 | 1.90486E-06 |
| GO:BP | alpha-beta T cell differentiation                       | GO:0046632 | 2.37984E-06 |
| GO:BP | leukocyte proliferation                                 | GO:0070661 | 2.43872E-06 |
| GO:BP | regulation of intracellular signal transduction         | GO:1902531 | 2.53022E-06 |
| GO:BP | interferon-gamma production                             | GO:0032609 | 2.69463E-06 |
| GO:BP | regulation of molecular function                        | GO:0065009 | 2.73685E-06 |
| GO:BP | regulation of signaling                                 | GO:0023051 | 3.33121E-06 |
| GO:BP | cytokine production                                     | GO:0001816 | 3.34291E-06 |
| GO:BP | defense response to other organism                      | GO:0098542 | 3.7411E-06  |
| GO:BP | viral life cycle                                        | GO:0019058 | 4.17098E-06 |
| GO:BP | positive regulation of leukocyte differentiation        | GO:1902107 | 4.60413E-06 |
| GO:BP | regulation of signal transduction                       | GO:0009966 | 5.91401E-06 |
| GO:BP | intracellular signal transduction                       | GO:0035556 | 6.03729E-06 |
| GO:BP | response to stimulus                                    | GO:0050896 | 7.64358E-06 |
| GO:BP | regulation of cytokine production                       | GO:0001817 | 7.89258E-06 |
| GO:BP | cellular response to chemical stimulus                  | GO:0070887 | 8.01913E-06 |
| GO:BP | apoptotic process                                       | GO:0006915 | 8.78504E-06 |

|       |                                                                      |                    |             |
|-------|----------------------------------------------------------------------|--------------------|-------------|
| GO:BP | negative regulation of immune system process                         | GO:0002683         | 8.79494E-06 |
| GO:BP | regulation of interferon-gamma production                            | GO:0032649         | 1.2927E-05  |
| GO:BP | positive regulation of cell-cell adhesion                            | GO:0022409         | 1.59678E-05 |
| GO:BP | leukocyte activation involved in immune response                     | GO:0002366         | 1.70625E-05 |
| GO:BP | positive regulation of cytokine production                           | GO:0001819         | 1.7758E-05  |
| GO:BP | cell activation involved in immune response                          | GO:0002263         | 2.08217E-05 |
| GO:BP | regulation of cell communication                                     | GO:0010646         | 2.11051E-05 |
| GO:BP | regulation of viral life cycle                                       | GO:1903900         | 2.59607E-05 |
| GO:BP | regulation of immune response                                        | GO:0050776         | 2.72949E-05 |
| GO:BP | cell-cell adhesion                                                   | GO:0098609         | 3.44019E-05 |
| GO:BP | regulation of viral genome replication                               | GO:0045069         | 3.6024E-05  |
| KEGG  | Hepatitis C                                                          | KEGG:05160         | 3.66394E-05 |
| GO:BP | regulation of leukocyte proliferation                                | GO:0070663         | 3.89028E-05 |
| GO:BP | innate immune response                                               | GO:0045087         | 4.14328E-05 |
| GO:BP | regulation of catalytic activity                                     | GO:0050790         | 5.65859E-05 |
| GO:BP | positive regulation of lymphocyte activation                         | GO:0051251         | 5.8565E-05  |
| GO:BP | regulation of hemopoiesis                                            | GO:1903706         | 6.33616E-05 |
| GO:BP | negative regulation of viral genome replication                      | GO:0045071         | 6.81515E-05 |
| GO:BP | positive regulation of macromolecule metabolic process               | GO:0010604         | 7.14836E-05 |
| GO:BP | positive regulation of leukocyte proliferation                       | GO:0070665         | 7.71619E-05 |
| GO:BP | cell death                                                           | GO:0008219         | 8.16649E-05 |
| KEGG  | Measles                                                              | KEGG:05162         | 8.24625E-05 |
| REAC  | Antiviral mechanism by IFN-stimulated genes                          | REAC:R-HSA-1169410 | 9.77261E-05 |
| GO:BP | leukocyte mediated immunity                                          | GO:0002443         | 9.88455E-05 |
| GO:BP | regulation of cell death                                             | GO:0010941         | 0.000114359 |
| GO:BP | regulation of alpha-beta T cell activation                           | GO:0046634         | 0.000117476 |
| GO:BP | positive regulation of CD4-positive, alpha-beta T cell proliferation | GO:2000563         | 0.000121728 |
| GO:BP | regulation of cell killing                                           | GO:0031341         | 0.000123569 |
| GO:BP | positive regulation of metabolic process                             | GO:0009893         | 0.00012551  |
| GO:BP | lymphocyte proliferation                                             | GO:0046651         | 0.000129319 |
| GO:BP | positive regulation of biological process                            | GO:0048518         | 0.000159803 |
| GO:BP | mononuclear cell proliferation                                       | GO:0032943         | 0.000163157 |
| REAC  | Signaling by Interleukins                                            | REAC:R-HSA-449147  | 0.000169936 |
| GO:BP | programmed cell death                                                | GO:0012501         | 0.000248041 |
| KEGG  | Acute myeloid leukemia                                               | KEGG:05221         | 0.000251813 |
| GO:BP | viral genome replication                                             | GO:0019079         | 0.000296892 |
| GO:BP | response to interferon-gamma                                         | GO:0034341         | 0.000313613 |
| GO:BP | regulation of lymphocyte differentiation                             | GO:0045619         | 0.000324855 |
| GO:BP | regulation of lymphocyte proliferation                               | GO:0050670         | 0.000326491 |
| GO:BP | regulation of developmental process                                  | GO:0050793         | 0.000333801 |

|       |                                                                            |                    |             |
|-------|----------------------------------------------------------------------------|--------------------|-------------|
| GO:BP | positive regulation of signaling                                           | GO:0023056         | 0.000365836 |
| GO:BP | regulation of mononuclear cell proliferation                               | GO:0032944         | 0.000388658 |
| GO:BP | regulation of localization                                                 | GO:0032879         | 0.000393151 |
| GO:BP | regulation of programmed cell death                                        | GO:0043067         | 0.000450133 |
| KEGG  | Influenza A                                                                | KEGG:05164         | 0.000450237 |
| GO:BP | MAPK cascade                                                               | GO:0000165         | 0.000500188 |
| GO:BP | positive regulation of response to stimulus                                | GO:0048584         | 0.000599008 |
| GO:BP | regulation of viral process                                                | GO:0050792         | 0.000606025 |
| GO:BP | positive regulation of developmental process                               | GO:0051094         | 0.000664419 |
| GO:BP | signal transduction by protein phosphorylation                             | GO:0023014         | 0.000700954 |
| GO:BP | regulation of apoptotic process                                            | GO:0042981         | 0.000764887 |
| GO:BP | regulation of MAPK cascade                                                 | GO:0043408         | 0.000789738 |
| GO:BP | positive regulation of intracellular signal transduction                   | GO:1902533         | 0.000811215 |
| REAC  | Estrogen-dependent nuclear events downstream of ESR-<br>membrane signaling | REAC:R-HSA-9634638 | 0.000850341 |
| GO:BP | regulation of response to stress                                           | GO:0080134         | 0.00087964  |
| GO:BP | response to molecule of bacterial origin                                   | GO:0002237         | 0.000882171 |
| KEGG  | Chemokine signaling pathway                                                | KEGG:04062         | 0.000939578 |
| GO:BP | positive regulation of cellular process                                    | GO:0048522         | 0.000996043 |
| GO:BP | positive regulation of cell communication                                  | GO:0010647         | 0.00103145  |
| GO:BP | signal transduction                                                        | GO:0007165         | 0.00106278  |
| GO:BP | cell killing                                                               | GO:0001906         | 0.001128974 |
| GO:BP | regulation of T cell differentiation                                       | GO:0045580         | 0.001135157 |
| GO:BP | regulation of cellular component movement                                  | GO:0051270         | 0.001201697 |
| GO:BP | negative regulation of viral life cycle                                    | GO:1903901         | 0.001226156 |
| GO:BP | positive regulation of protein phosphorylation                             | GO:0001934         | 0.001319011 |
| GO:BP | leukocyte mediated cytotoxicity                                            | GO:0001909         | 0.001388606 |
| GO:BP | negative regulation of biological process                                  | GO:0048519         | 0.001430091 |
| GO:BP | positive regulation of protein kinase activity                             | GO:0045860         | 0.001453616 |
| GO:BP | positive regulation of lymphocyte proliferation                            | GO:0050671         | 0.001531273 |
| GO:BP | CD4-positive, alpha-beta T cell differentiation                            | GO:0043367         | 0.00158196  |
| GO:BP | positive regulation of mononuclear cell proliferation                      | GO:0032946         | 0.001707031 |
| GO:BP | positive regulation of cell population proliferation                       | GO:0008284         | 0.001732923 |
| GO:BP | positive regulation of signal transduction                                 | GO:0009967         | 0.001755233 |

This table has been truncated to the top 150 enriched terms selected on the basis of lowest adjusted *P*-value. GO:BP, Gene Ontology biological process database; REAC, Reactome pathway database; KEGG, KEGG pathway database.



### 3 Supplementary Figures

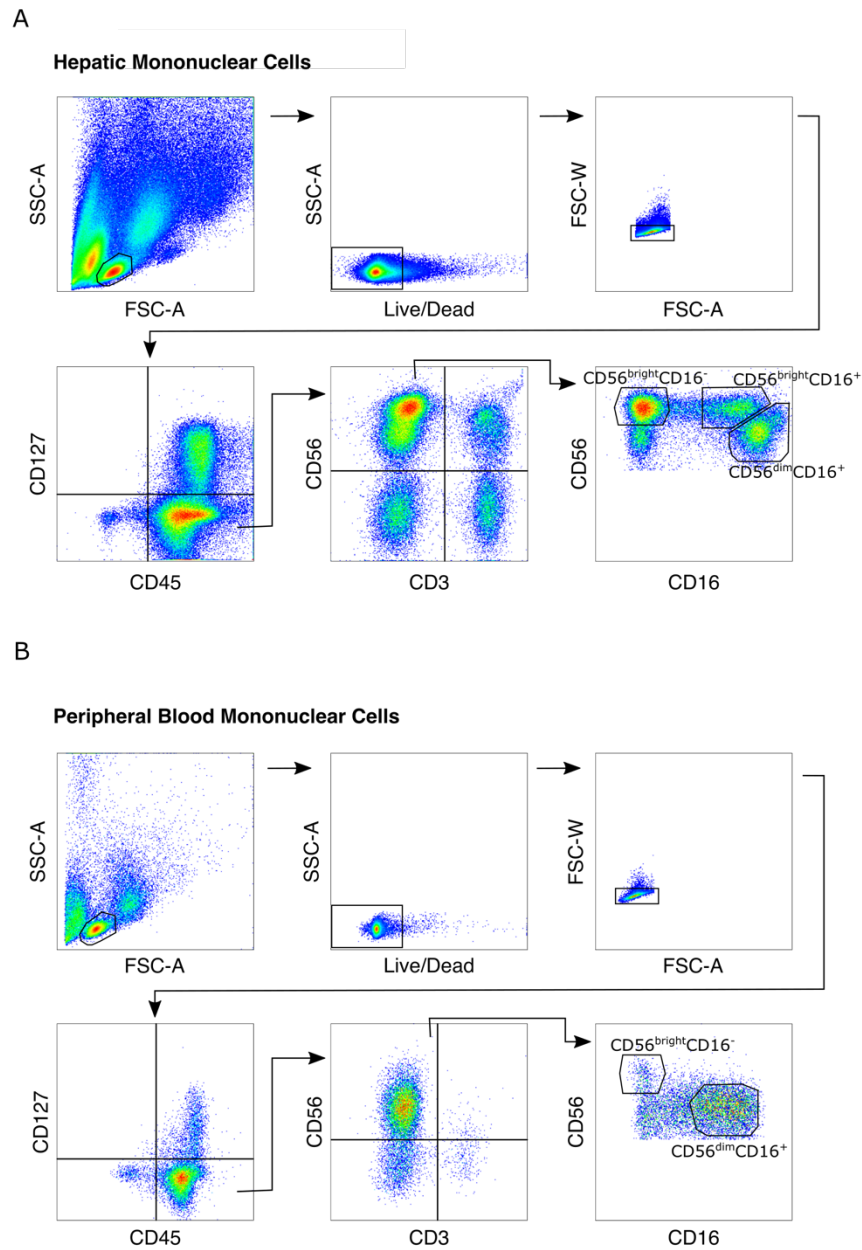

#### Supplementary Figure 1: Gating strategy for FACS analysis of NK cell populations

Flow cytometry gating strategy for RNA sequencing analysis of sorted NK cell subpopulations. **A**, Gating strategy for the analysis of NK cells derived from liver perfusate and tissue samples (HMNCs). **B**, Gating strategy for the analysis of NK cells derived from peripheral blood samples (PBMCs).

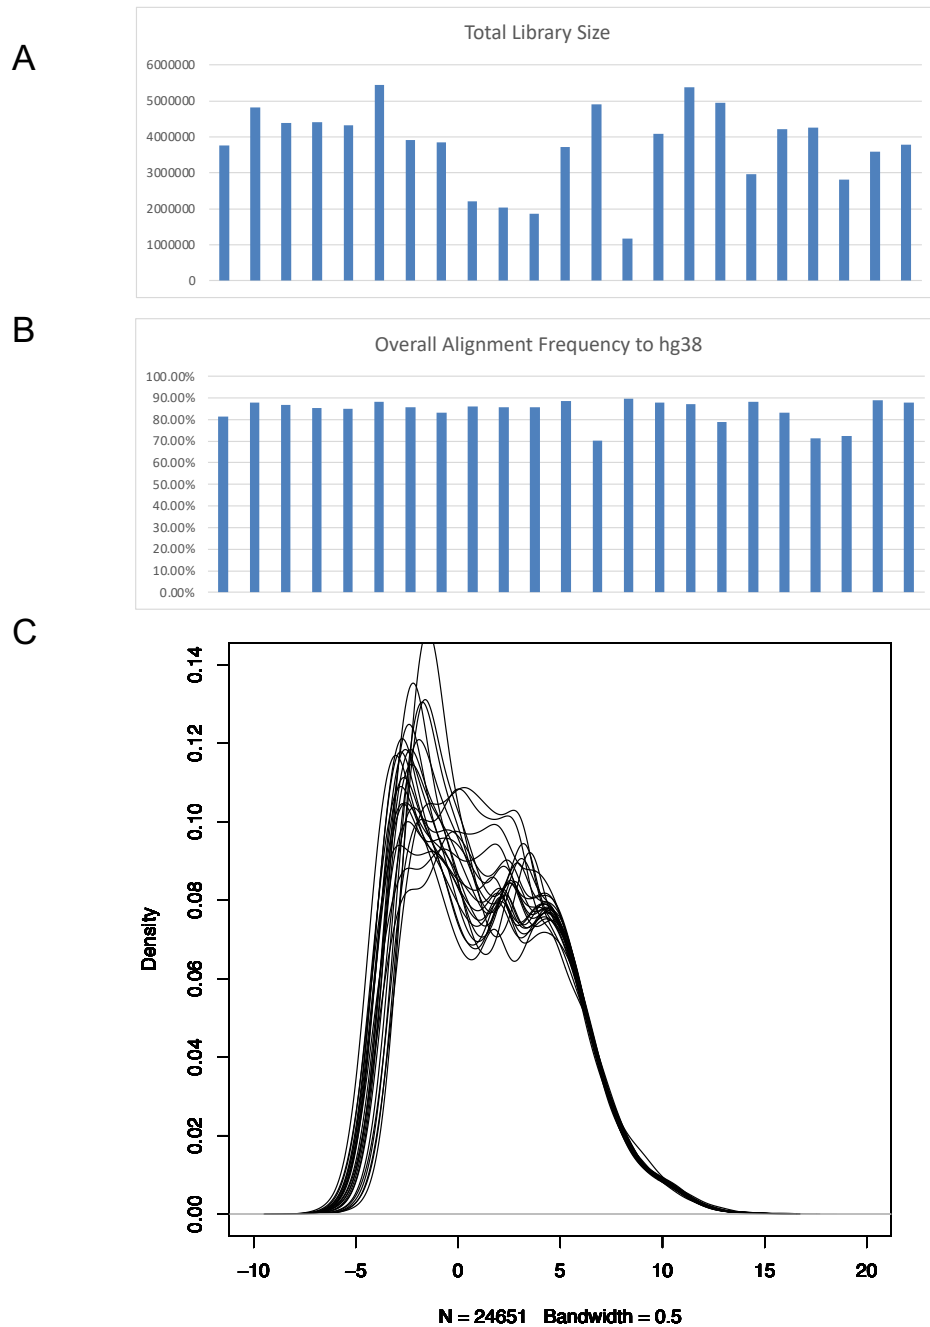

### Supplementary Figure 2: RNA sequencing read counts and distribution

**A**, Total library size from the RNA sequencing libraries following data cleaning and filtering. **B**, The alignment frequency of total reads to hg38. **C**, Density plot showing the normalised counts for each sample.

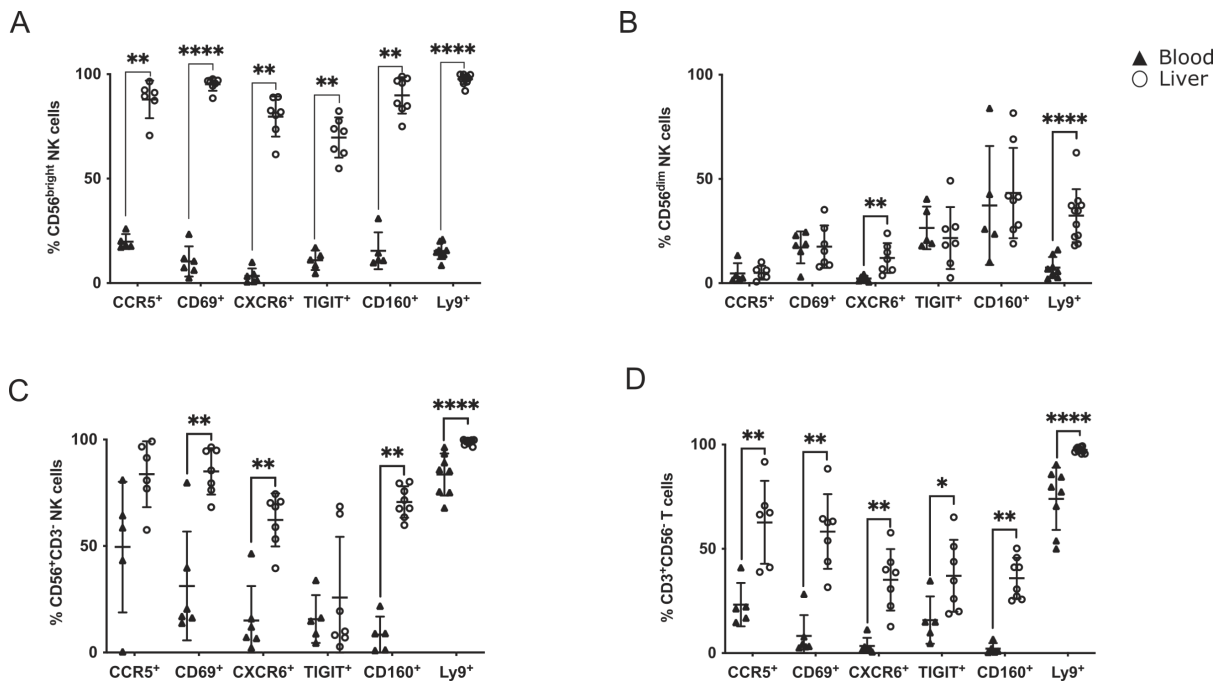

### Supplementary Figure 3: Cell surface protein expression on NK and T cell sub-populations

Flow cytometry analysis of immune cells isolated from liver perfusate and peripheral blood samples (n5-8 blood, n=5-11 perfusate). Cells were stained with mAbs against CCR5, CD69, CXCR6, TIGIT, CD160 and Ly9. **A-D**, Percentage expression of each marker on CD56<sup>bright</sup> NK cells (**A**), CD56<sup>dim</sup> NK cells (**B**), CD3<sup>+</sup>CD56<sup>-</sup> T cells (**C**) and CD56<sup>+</sup>CD3<sup>+</sup> T cells (**D**) in blood (triangle) and liver perfusate (circle) samples. Data analysed using a Mann Whitney t test. \*p<0.05, \*\*p<0.01, \*\*\*\*p<0.0001

A

**P-NK and H-NK coculture with PBMC**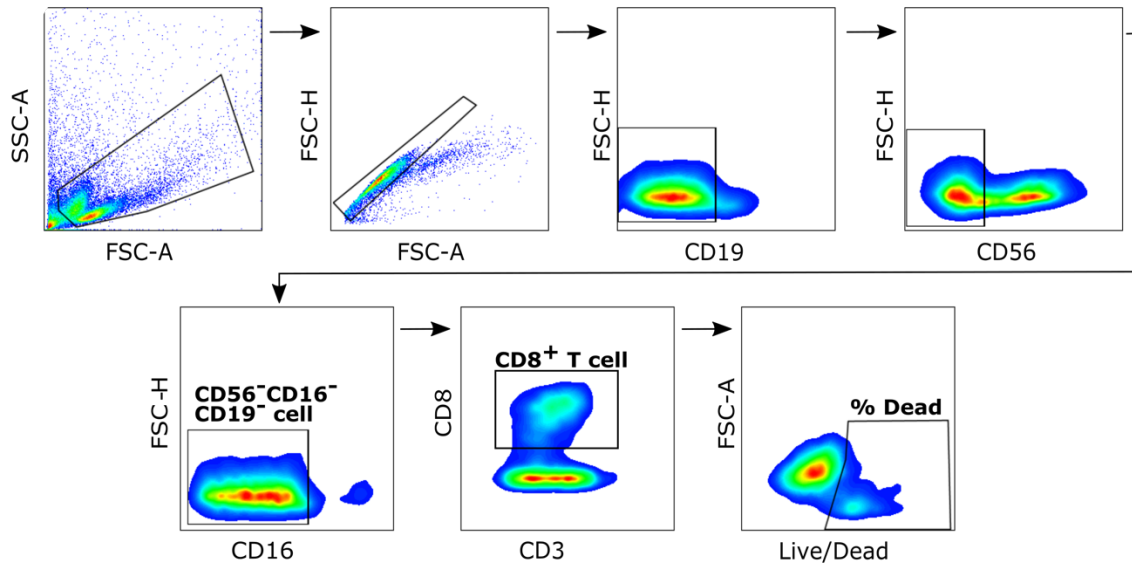

B

**H-NK and PBMC or CD3<sup>+</sup> T cell coculture**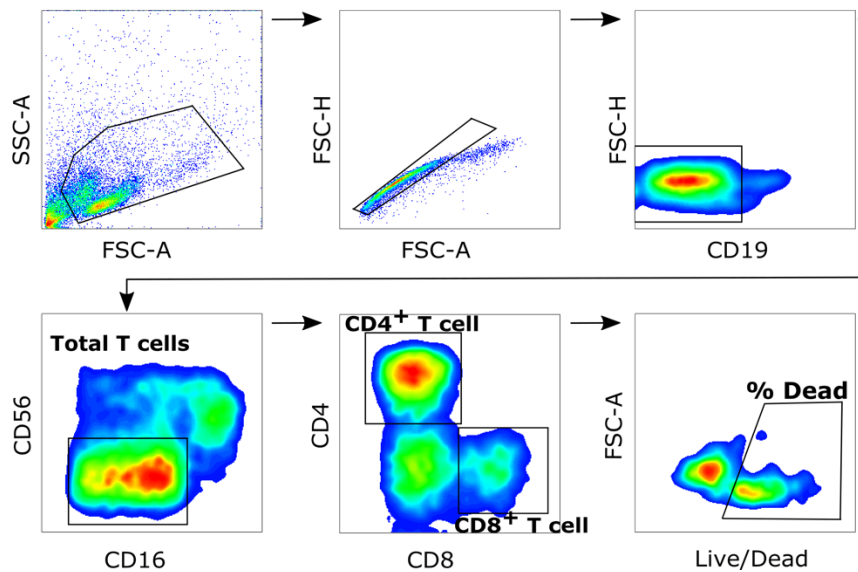**Supplementary Figure 4: Gating strategy for cytotoxicity experiments**

Flow cytometry gating strategies for analysis of T cell death post coculture with NK cells for 24hours. **A**, Gating strategy for the analysis of T cells post coculture with peripheral blood NK (P-NK) cells or hepatic NK (H-NK) cells at varying ratios (corresponding to data in Figure 3). **B**, Gating strategy for the analysis of T cell populations post coculture with H-NK cells at a 1:1 ratio (corresponding to data in Figure 4).

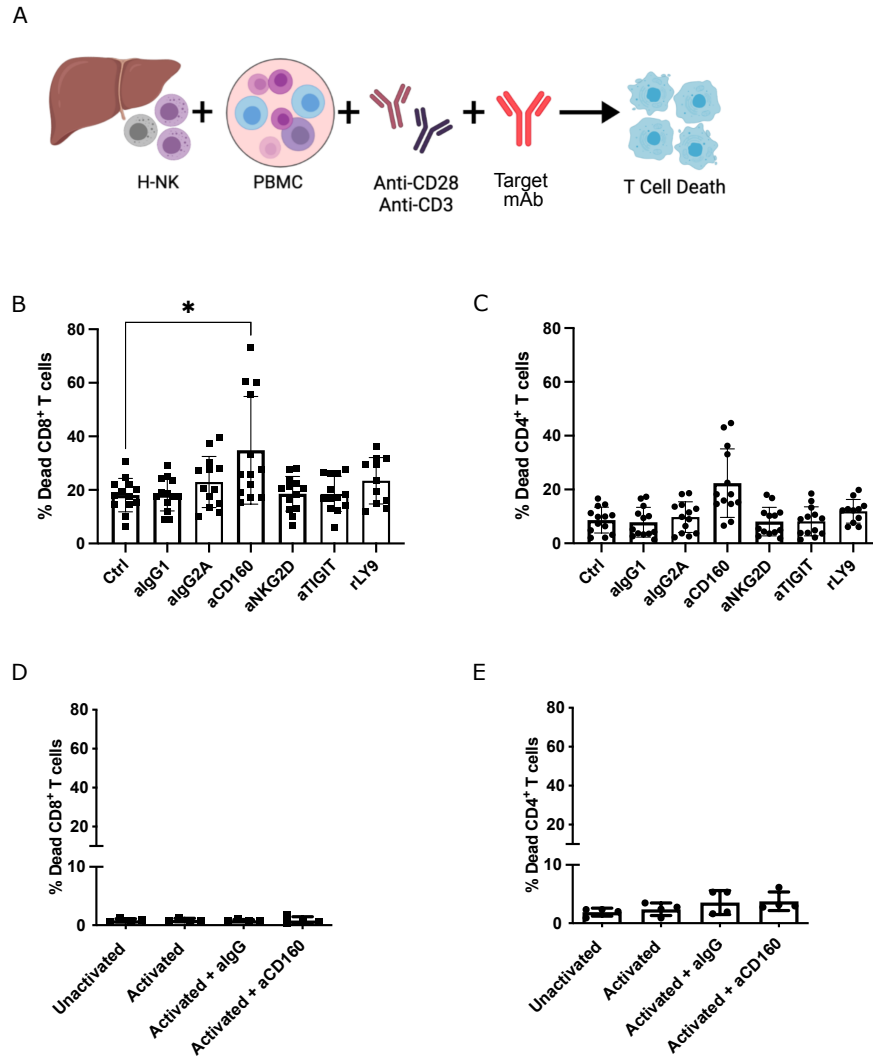

**Supplementary Figure 5: Hepatic NK cells' killing of activated CD8<sup>+</sup> T cells is enhanced via CD160 engagement and this is not via a direct effect of the anti-CD160 mAb on T cells.**

PBMCs were activated with anti-CD3/28 and cultured alone or with H-NK cells and mAbs against CD160, NKG2D, ICAM-1, TIGIT, LFA-1, IgG1, IgG2A controls or recombinant Ly9 protein for 24 hrs (n=11-13). **A**, Schematic illustrating the experimental coculture set up. **B-C**, Percent dead CD8<sup>+</sup> T cells (**B**) and CD4<sup>+</sup> T cells (**C**) post-coculture with H-NK in activated control (Ctrl) and each treatment group. **D-E**, Percent dead CD8<sup>+</sup> T cells (**D**) and CD4<sup>+</sup> T cells (**E**) in PBMC monocultures in specified treatment groups. Data analysed by Friedman test with Dunn's multiple comparison test. \*, p<0.05.
